# Supplementary material for: Costing malaria interventions from pilots to elimination programmes
Source: Malar J. 2020 Sep 14;19:332. doi: 10.1186/s12936-020-03405-3 (PMC7491157; doi:10.1186/s12936-020-03405-3)
Supplement: Supplementary file 2 — Additional file 2. Reference implementation scenarios detailing operational assumptions by intervention. A large Excel table that details by intervention resource lists and quantities of resources costed for each operational activity across all implementation stages (i.e. from the initial micro-planning on the new intervention to evaluation). The table offers a descriptive intervention narrative to aid in interpretation of the cost estimates derived here. [file 12936_2020_3405_MOESM2_ESM.xlsx]

## Sheet: reference
Reference implementation
			Rapid Reporting - Localized rapid reporting systems to diagnose, track, and treat malaria cases and commodities				Reactive Case Detection - Reactive focal testing and treatment of individuals living near clinical cases diagnosed and treated passively at health facilities or community level				Mass Drug Administration - A full therapeutic course of antimalarial medicine administered to a defined population living in a defined geographical area without previous testing				focal Indoor Residual Spraying - Operational strategy tor malaria vector control involving spraying interior surfaces of dwellings with a residual insecticide to kill or repel endophilic mosquitoes (district level teams covering multiple HFCAs)
Activity	Abbr		Sub-activity	Assumptions	Notes		Sub-activity	Resource list	Notes		Sub-activity	Resource list	Notes		Sub-activity	Resource list	Notes
Planning	plan			5 years, 3%				5 years, 3%				1 year				1 year
			Micro-planning	Central NMCP staff - 10 days, 5 staff Region staff - 4 days, 2 staff District staff - 4 days, 2 staff			Micro-planning	Central level - 10 days, 8 staff Regional level - 4 days, 3 staff District level- 4 days, 5 staff			Micro-planning	Central level - 10 (5) days, 8 staff Regional level - 4 days, 3 staff District level- 4 days, 5 staff	WHO ref - 8 weeks duration of preparation, training and implementation Other NTD publications cite 2-3 months duration before the campaign https://www.ncbi.nlm.nih.gov/pmc/articles/PMC3191128/ https://www.ncbi.nlm.nih.gov/pmc/articles/PMC3503583/ Number of district staff from MACEPA step D 5 days at central level and 4 days at levels below national Planning the same for RCD, tMDA, reactive fMDA; …		Micro-planning	Central level - 10 days, 5 staff Regional level - 4 days, 3 staff District level- 4 days, 5 staff	Ref. WHO IRS manual, table 5 Central level - 5 staff Regional level - 2 staff District level- 6 staff From MACEPA: 3 FTE dedicated to IRS program at central level, for these staff days for specific sub-activities are subtracted for the FTE days
			Planning meeting central level	5 central NMCP staff, 2 staff/ region and 2 staff/ district 1 day meeting (2 days inlc. travel) Region and district staff recieves per-diems (50% on travel days) Transport inlcudes km, vehicle, and driver for regional and district staff Meeting at NMCP offices Food and stationaries			Planning meeting central level	8 central NMCP staff, 3 staff/ region and 5 staff/ district 2 day meeting (3 days inlc. travel) Region and district staff receives per-diems (50% on travel days) Transport inlcudes km, vehicle, and driver for regional and district staff Meeting at NMCP offices Food and stationaries			Planning meeting central level	8 central NMCP staff, 3 staff/ region and 5 staff/ district 2 day meeting (3 days inlc. travel) Region and district staff receives per-diems (50% on travel days) Transport inlcudes km, vehicle, and driver for regional and district staff Meeting at NMCP offices Food and stationaries			Planning meeting central level	5 central NMCP staff, 3 staff/ region and 5 staff/ district 4 2-day meetings (3 days inlc. travel) Region and district staff receives per-diems (50% on travel days) Transport inlcudes km, vehicle, and driver for regional and district staff Meeting at NMCP offices Food and stationaries	Number of meetings based on Zambia NMCP TWG
			Planning meeting district level	1 central NMCP staff per district, 2 regional staff per district. 4 district staff, 1 day meeting (2 days incl travel) Central and regional staff recieves per-diems (50% on travel days) Transport inlcudes km, vehicle, and driver for regional and district staff Meeting at district NMCP offices Food and stationaries			Planning meeting district level	1 central NMCP staff per district, 3 regional staff per district , 5 district staff 2 day meeting (3 days incl travel) Central and regional staff recieves per-diems (50% on travel days) Transport inlcudes km, vehicle, and driver for central and regional staff Meeting at district NMCP offices Food and stationaries			Planning meeting district level	1 central NMCP staff per district, 3 regional staff per district , 5 district staff 2 day meeting (3 days incl travel) Central and regional staff recieves per-diems (50% on travel days) Transport inlcudes km, vehicle, and driver for central and regional staff Meeting at district NMCP offices Food and stationaries	No census, but HF population counts and national reporting; conducted by NMCP and MACEPA		Planning meeting district level	1 central NMCP staff per district, 2 regional staff per district , 5 district staff 2 2-day meetings (3 days incl travel) Central and regional staff recieves per-diems (50% on travel days) Transport inlcudes km, vehicle, and driver for central and regional staff Meeting at district NMCP offices Food and stationaries	From MACEPA: The program does entomological monitoring on a regular basis. PMI supports efficacy testing, vector abundance and speciation monitoring. This occurs every year. Household mapping is not usually done, but is on occasion.
Procurement	proc		Procurement of supplies and commodities	Per district: 1 modem Per HF conducting RR: 1 mobile phone 1 SIM card 1 solar phone charger			Procurement of supplies and commodities	Per CHW: 1 pack of supplies (apron, soap, notebook, etc) , 1 bike RDT and gloves based on number screened +5% wastage ACT based on number positives+5% wastage Per d CHW: 1 mobile (phone, battery, sim, charger)	<Kits provided routinely by MoH		Procurement of supplies and commodities	Per CHW: 1 pack of supplies (back pack, stationary, other medical supplies) DHAp based on target population size + 5% wastage Pregnancy tests based on population estimate +5% wastage	Phones were regarded as research cost during the MDA in Zambia Malaria recommends 25% buffer stock, NTDs recommends 15% buffer stock (http://apps.who.int/medicinedocs/documents/s22013en/s22013en.pdf) Ignore buffer stock, only costing what was used		Procurement of supplies and commodities at central level	Personal protection per spray operator: 1 pack (Overalls 2, Gumboots 1, Spare respirator catridges 2, Respirators 1, Helmet 1, Clear goggles 1, PVC gloves 2, Mutton cloth 1, Socks 2, Towel 1) Equipment per spray operator: 8–10 litre compression sprayers 5% replacement rate, 5 years ULY Per spray team: 2 wrenches, 1 screwdriver, 2 pair pliers + 5% (nozzles, gaskets, springs and lances) 0.3l per of…	In addition to spare nozzles, programmes should stock other spare parts, especially gaskets, springs and lances, which can be prone to damage. (Ref. WHO IRS manual) From MACEPA: kits are distributted annually, except for helmets, overalls, and gumboots - these are replaced every second year
Storage	store		Storage of supplies and commodities				Storage of supplies and commodities	1 month/ round at central level 2 months/ round at district level Based on calculated volume of drugs, diagnostics and other supplies	<Proportion of supply managment costs added to landed costs on ACTs and RDTs in Benin and Kenya from Shretta et al. Malaria Journal (2015) :https://malariajournal.biomedcentral.com/articles/10.1186/s12936-014-0530-1 <MACEPA suggested existing capacity to accommodate extra stock for CI		Storage of supplies and commodities	1 month/ round at central level 2 months/ round at district level Based on calculated volume of drugs, diagnostics and other supplies			Storage of supplies and commodities	1 month/ round at central level for insecticide 3 months/ round at district level for insecticide and 12 months for equipment Based on calculated volume of spraying equipment and insecticide Store-keeper and guard wages per district	All spray equipment and associated items should be cleaned at the conclusion of the spray season and stored in a centralized location in the district (Ref. WHO IRS manual)
											Packing of supplies at central level		3 volunteers 6 days per 100.000 treatments Volunteers receive lunch & transport allowance Negligible amount ignore for costing purposes		Packing of supplies		Negligible amount ignore for costing purposes
Distribution	distr		Distribution of supplies and commodities from central level to HF	Mobile phone procured at central level, transported during routine supervisions etc. visits from central to district and district to HF; depending on scale If implemented widely, cascade distribution including vehicle hire (calculate volume for number of trips)			Distribution of supplies and commodities from central level to HF	Supplies are distributed from central to district level and HF levels, number of trucks per district based on volume of supplies transported Mobile phones procured at central level and transported to district - 1 district level staff accompanying; from district to HF during routine supervision visist	Standard truck container volume = approx. 68 m3 Commodities and supplies are distributed at once for all rounds by district malaria focal person; drugs are stored at central level and then distrubuted to districts and further on to HF; 10 tonne trucks from central to district (owned by NMCP), then Hardtop Toyota Landcruiser to HF from district		Distribution of supplies and commodities from central level to HF	Supplies are distributed from central to district level, number of trucks per district based on volume of supplies transported 1 loader and 1 offloader per district Offloaders receive daily allowance	Standard truck container volume = approx. 68 m3 Commodities and supplies are distributed at once for all rounds by district malaria focal person; drugs are stored at central level and then distrubuted to districts and further on to HF; 10 tonne trucks from central to district (owned by NMCP), then Hardtop Toyota Landcruiser to HF from district		Distribution of supplies and commodities from central level to district	Supplies are distributed from central to district level using 10-tonne trucks, number of trucks per district based on volume of supplies transported 1 driver and 1 assistant per truck 1 truck services 1 district in 1.5 days 6 loader/offloader per district Offloaders receive daily allowance
Community sensitization	sens						Advocacy meeting with community leaders at district level	1 region staff, 2 district staff, 5 facilitators (HF nurses, total per district) 15 community leaders per meeting 1/3 day meeting Transport for facilitators & community leaders based on flat rate Gifts for community leaders Food allowance IEC materials Hall rental Refreshments	Based on MACEPA communitcation on average 5-6 meetings of different type are carried out per district. Calculate total cost for community sensitization averaging across all meetings (same participants from the program are assumed to take part). Assume 5 meetings per district		Advocacy meeting with community leaders at district level	1 region staff, 2 district staff, 5 facilitators (HF nurses, total per district) 15 community leaders per meeting 1/3 day meeting Transport for facilitators & community leaders based on flat rate Gifts for community leaders Food allowance IEC materials Hall rental Refreshments 2 central staff 10 days per year supervising sensitization, driver and vehicle	Based on MACEPA communitcation on average 5-6 meetings of different type are carried out per district. Calculate total cost for community sensitization averaging across all meetings (same participants from the program are assumed to take part). Assume 5 meetings per district Added central staff on feedback from MACEPA		Advocacy meeting with community leaders at district level	1 region staff, 2 district staff, 5 facilitators (HF nurses, total per district) 15 community leaders per meeting 1/3 day meeting Transport for facilitators & community leaders based on flat rate Gifts for community leaders Food allowance IEC materials Hall rental Refreshments	A total of 5 community sensitization meetings per district based on Zambia NMCP Added 1 central staff on feedback from MACEPA, 10 days for each year IRS is conducted
							Community forum at district level	1 region staff, 2 district staff, 5 facilitators (HF nurses), 15 community leaders per meeting 200 atendees 1/3 day meeting Per-diem for faciliators Animator fee Transportation for regional staff based on km, vehicle, and driver Transportation for faciliators and animators based on a flat fee Sound eqiupment Tent Refreshments			Community forum at district level	1 region staff, 2 district staff, 5 facilitators (HF nurses), 15 community leaders per meeting 200 atendees 1/3 day meeting Per-diem for faciliators Animator fee Transportation for regional staff based on km, vehicle, and driver Transportation for faciliators and animators based on a flat fee Sound eqiupment Tent Refreshments			Community forum at district level	1 region staff, 2 district staff, 5 facilitators (HF nurses), 15 community leaders per meeting 200 atendees 1/3 day meeting Per-diem for faciliators Animator fee Transportation for regional staff based on km, vehicle, and driver Transportation for faciliators and animators based on a flat fee Sound eqiupment Tent Refreshments
							Community entry meeting	At district level 1 region staff, 2 district staff, 5 facilitators (HF nurses), 15 community leaders per meeting 200 atendees 1/3 day per district Allowance for drama group Sound eqiupment Tent			Community entry meeting	At district level 1 region staff, 2 district staff, 5 facilitators (HF nurses), 15 community leaders per meeting 200 atendees 1/3 day per district Allowance for drama group Sound eqiupment Tent			Community entry meeting	At district level 1 region staff, 2 district staff, 5 facilitators (HF nurses), 15 community leaders per meeting 200 atendees 1/3 day per district Allowance for drama group Sound eqiupment Tent
							Social mobilization at community level	IEC materials inlcuding information fliers and posters printed and distributed through HF and CHWs			Social mobilization at community level	IIEC materials inlcuding information fliers and posters printed and distributed through HF and CHWs			Public announcement system	PAS for up to half days of the campaign per district (megaphones, vehicles driving in the community broadcasting announcements about the IRS campaign)
											Radio broadcasts	2 panel discussions on the radio 10 (45 second) announcements on 2 radio stations during campaign	Average cost per segment includes cost of panel discussions allocated across all segments		Radio broadcasts	2 panel discussions on the radio 10 (45 second) announcements on 2 radio stations during campaign	Average cost per segment includes cost of panel discussions allocated across all segments
Training	train			5 years, 3%				3 years, 3%,	MACEPA: CHW re-trained every 2.5 years			1 year
			Training of supervisors/ trainers at central level	5 central staff, 2 staff/ region and 2 staff/ district 2 day training (3 days incl travel) Region and district staff recieves per-diems (50% on travel days) Transport inlcudes km, vehicle, and driver for district staff Meeting at NMCP offices Food and stationaries			Training of supervisors at central level	8 central staff, 3 region staff, 5 district staff 4 days training (6 including travel) Region, and district staff get per-diems (50% on travel days) Transport inlcudes km, vehicle, and driver for regional and district staff Meeting at NMCP officies Food and stationaries			Training of supervisors at central level	8 central staff, 3 region staff, 5 district staff 4 days training (5 including travel) Region, and district staff get per-diems (50% on travel days) Transport inlcudes km, vehicle, and driver for regional and district staff Meeting at NMCP officies Food and stationaries			Training of supervisors at central level	5 central staff, 3 region staff, 5 district staff 5 days training (6 including travel) Region, and district staff get per-diems (50% on travel days) Transport inlcudes km, vehicle, and driver for regional and district staff Meeting at NMCP officies Food and stationaries
							Training of trainers at regional level	1 central staff, 2 regional staff, 5 district staff, 1 HF staff, 1 CHW per HF 4 days training (4 days including traveling) Region, HF staff and CHW recieves per-diems (50% on travel days) Transport inlcudes km, vehicle, and driver for regional staff Flat transportation allowance for HF staff and CHW Hall rental Bus hire for field work Training materialsand stationaries Food			Training of trainers at regional level	1 central staff, 2 regional staff, 5 district staff, 1 HF staff, 1 CHW per HF 4 days training (5 days including travel) Region, HF staff and CHW recieves per-diems (50% on travel days) Transport inlcudes km, vehicle, and driver for regional staff Flat transportation allowance for HF staff and CHW Hall rental Training materials and stationaries Food			Training of trainers at regional level	1 central staff, 2 regional staff, 5 district staff, 4 HF staff per district 5 days training (6 days including travel) Central, district, HF staff recieves per-diems (50% on travel days) Transport inlcudes km, vehicle, and driver for central and district staff Flat transportation allowance for HF staff Hall rental Training materials and stationaries Food IRS-related training supplies Bus rental f…
			Training of nurses at district level	1 central staff, 2 regional staff, 2 district staff, and 1 nurse per HF 2 day training (3 days incl travel) Nurses recieve per-diems (50% on travel days) Flat transportation allowance Meeting at district NMCP offices Food and stationaries			Training of CHW at district level	2 regional staff, 5 district staff, 2 HF staff and 1 CHW in MDA, combine multiple HFs per training up to 40 participants CHW recieve per-diems 4 days training (5 including travel) CHW recieve per-diems Flat transportation allowance for HF staff and CHW Tent rental Bus hire for field work Training materials and stationaries Food	<Size of training group as per MACEPA training guide for RACD: participants include EHT and CHW <Multiple HFCAs trained together <A core group of trainers from provincial level are used for all trainings, moving from district to district <Per 35 CHWs 5-6 trainers are used (MACEPA)		Training of CHW at district level	2 regional staff, 5 district staff, 2 HF staff and 1 CHW in MDA, combine multiple HFs per training up to 40 participants CHW recieve per-diems 4 days training (5 including travel) CHW recieve per-diems Flat transportation allowance for HF staff and CHW Tent rental Bus hire for field work Training materials and stationaries Food			Training of Spray Operators at district level	2 regional staff, 5 district staff, 4 HF staff and 42 spray operators/ per district 7 days training (8 including travel) Central, regional, HF staff and spray operators recieve per-diems (50% on travel days) Transport inlcudes km, vehicle, and driver for central and regional staff Flat transportation allowance for HF staff and spray opertors, also recieve a food allowance during training days Ten…	The training course should take place over 5–7 days. 3–5 days should be dedicated to the practical portion of the training. (Ref. WHO IRS manual) Multiple districts are trained together up to 40 trainees per trainings (in Zambia up to 65), in Zambia the range for spray operators per district was between 20 and 150 (population and rural/urban, area size)
							Training of CHW at HFCA level	2 HF staff and 2 CHW facilitators and all CHWs in MDA, combine multiple HFs per training up to 40 participants 4 days training (5 including travel) CHWs that participate as trainers are compensated at nurse daily wage No per-diems to either CHW or nurses Flat transportation allowance for HF staff and CHW Tent rental Bus hire for field work Training materials and stationaries Food			Training of CHW at HFCA level	2 HF staff and 2 CHW facilitators and all CHWs in MDA, combine multiple HFs per training up to 40 participants 4 days training (5 including travel) CHWs that participate as trainers are compensated at nurse daily wage No per-diems to either CHW or nurses Flat transportation allowance for HF staff and CHW Tent rental Bus hire for field work Training materials and stationaries Food	If MDA was done before, i.e. 1 year earler training reduced to 1-2 days; otherwise MDA trainings are part of core refreshment training of staff on drug administration		Training of spray operators at HFCA level		The structure and organization of campaigns may vary from centralized programmes with operations managed at the national level, to decentralized programmes where operations are managed at the provincial or district levels. There have been some programmes (e.g. in Ethiopia) where IRS has been successfully managed at the community level (Ref. WHO IRS manual) Community-based IRS can be evaluated as …
Program management and supervision	super		Program management	Central NMCP staff 1-days per year, 2 staff Regional staff 1- days per year, 2 staff District staff 1-days per year, 2 staff Facility, supplies, and office equipment allocated based on number of days and number of staff at central and district levels			Program management	Central NMCP staff 3-days per year, 8 staff Regional staff 3- days per year, 3 staff District staff 3-days per year, 5 staff Facility, supplies, and office equipment allocated based on number of days and number of staff at central and district levels	<In MACEPA plans: 1 malaria focal person 1 day/ week, 1 pharmasist 0.5 days/ week oer district		Program management	Central NMCP staff 3-days per year, 8 staff Regional staff 3- days per year, 3 staff District staff 3-days per year, 5 staff Facility, supplies, and office equipment allocated based on number of days and number of staff at central and district levels			Program management	Central NMCP staff 3 FTE staff Regional staff 10- days per year, 2 staff District staff 20-days per year, 2 staff Facility, supplies, and office equipment allocated based on number of days and number of staff at central and district levels	Number of days based on Zambia NMCP IRC activity list, inlcude maintainance, storage, procurement etc.
			IT management	Module development Server fees Manteinance 20% proportion of time spent on malaria RR compared to other diseases	https://www.theglobalfund.org/en/monitoring-evaluation/strengthening/		IT management	Module development Server fees Manteinance 20% proportion of time spent on malaria RR compared to other diseases 30% of all malaria reporting to CI	based on zambia data (Larcen 2015) about a third of RDTs administered are through RACD, assume this is representative of the population seen by care provider and of volume of reporting etc. Attribute third of reporting costs to RACD. Much be lower in other settings (i.e. Senegal): Use a range between 5-30%
											Supervision by national staff		Higher levels supervise mainly sensitization, not so much the MDA campaign.		Supervision by national staff	3 central staff 10 days per round Central staff are paid per-diem Transport expenses based on driver per-diem, labor and vehicle costs MoH vehicles are used	From MACEPA: Unlike MDA campaigns, for IRS central level do provide some direct oversight over IRS although the bulk of the oversight is done by District staff
			Supervision by regional staff	1 region staff 3 days per district per year by regional staff Staff are paid per-diems (assumes supervision and travel are done in one day) Transport inlcudes km, vehicle, and driver for district staff			Supervision by regional staff	2 region staff 3 days per district per year by regional staff Staff are paid per-diems (assumes supervision and travel are done in one day) Transport inlcudes km, vehicle, and driver for district staff			Supervision by regional staff	2 region staff 10 days per region for sensitization, distribution, per round Region staff are paid per-diem Transport expenses based on driver per-diem, labor and vehicle costs MoH vehicles are used	Supervision visits cover multiple districts, HFCA areas, and distribution, sesnitization, MDA, and coverage surveys Greater supervision needs for the first round of campaign, rental vehicles only used if no capacity and only by central levels; Number of supervision days do not exceed number of campaign rounds!		Supervision by regional staff	1 region staff 10 days per round Region staff are paid per-diem Transport expenses based on driver per-diem, labor and vehicle costs MoH vehicles are used
			Supervision by district staff	1 district staff conducts supervision 4 days per district per year District staff are paid per-diems (assumes supervision and travel are done in one day) Transport inlcudes km, vehicle, and driver for district staff			Supervision by district staff	1 district staff 4 days per district per year District staff are paid per-diem Transport expenses based on driver per-diem, labor and vehicle costs			Supervision by district staff	2 district staff 10 days per district per round District staff are paid per-diem Transport expenses based on driver per-diem, labor and vehicle costs MoH vehicles are used	Supervision visits cover multiple HFCA areas, and distribution, sesnitization, MDA From MACEPA files 32 days campaign covering 40 HFCAs, and 10 districts		Supervision by district staff	3 district staff 10 days per district per round District staff are paid per-diem Transport expenses based on driver per-diem, labor and vehicle costs MoH vehicles are used 2 vehicles/ district	In Zambia 1 DMIO and 1 Planner- 10 days, 3 district staff- 4 days/ district > cost as 3 district staff to approximate
							Supervision by HF staff	1 staff per HF 4 days per year Transport expenses based on flat rate	EHT conduct supervision over CHW		Supervision by HF staff	Number of HF staff calculated assuming 1 staff per 5 teams per HFCA 10 days per HFCA HF staff get a transportation and food allowance	Each supervisor should be responsible for supervising no more than five teams in an area (WHO MDA practical field manual).		Supervision by HF supervisors	1 HF staff 1 days/week per round HF staff get a transportation and food allowance Assumed all district HFCAs are targeted, within each HFCA select structures are targetted (to match MACEPA population counts assumed 50% of structures within each HFCA)	Ref. WHO IRS manual: A weekly summary record is maintained by IRS subdistrict coordinators who track 2–5 spray teams and measure their weekly progress in relation to the total planned targets for the spray rounds In Zambia one supervisor per 4-8 teams, conducts supervision for 1 to 5 days per HFCA
Implementation	impl		RR	1 staff (i.e. nurse) per HF each dedicates 0.5 day per month (or about 1 hour each week) to RR 10 KB of data per phone per week Facility, supplies, and office equipment allocated based on number of days and number of staff at district	In some countries (e.g. Senegal) not all nurses have mobiles. There is a combination of mobile and paper-based reporting Nurses work 8 hours per day (20 days per month) spread between the different interventions CHW work 8 hours per day (20 days per month) in the different interventions during campaigns. When there is no campaign, 2 hours per day (5 days per month)		RACD	8 CHW per HFCA (based on 1 CHW to 750 population target) 1 CHW spends 1 day to follow-up 1 index case Up tp 6 HH (30 people) investigated within 120 meter radius RDT, ACT and medical supplies per individual tested and treated 1 bike per CHW Other supplies (Apron, backpack, notebook, etc) per CHW Top-up when reporting follow-up on index case			MDA	8 CHW per HFCA (based on 1 CHW to 750 population target) Campaign length 10 days 1 CHWs + 1 adherence officer following up on 3rd day 1 adherence officer per 2 CHWs DOT first dose 1 team covers 75 people (15 HH) per day the target is tied to number of CHW per HFCA, assuming only existing CHWs are used for MDA campaign as per MACEPA CHWs pick-up drugs at HF to be distributed on a daily basis Each …	In rural areas, where the population is more dispersed, one team should be able to distribute medicine to a maximum of 50–75 people (10–15 households) per day (Ref WHO MDA practical field manual. In MACEPA files number of days ranges from 6 to 25 Decision on MDA implementation is made at district level; number of HFs eligible are determined by district MACEPA program mode: Campaign length 10 days…		IRS	Campaign length 29 days 6 teams per district, each has 6 spray operators, 1 team leader 1 team covers 60 HH per day (10 per spray operator) Spray operators and team leaders get a daily food allowance, a fraction gets a lodging allowance to cover harder to reach areas Sprayers, personal protection, insecticide IRS camps/operations sites (matresses/ sleeping bags, stoves, cooking utensily, toiletri…	Ref. WHO IRS manual: Ideally, spray operations should be completed in less than 2 months The number of spray teams per district is 5–10, depending on how many structures need to be sprayed during a 6–8 week spray campaign 1 team: - 1 leader - 5/10 spray operators - 1 community mobilizer - 1 driver In cases where households are both easy to access and near to each other, one spray operator should …	25.4286
															Soak pits		https://www.sciencedirect.com/science/article/pii/S0301479716302857 Assume these are constructed by teams on the group, covered under implementation
											Stock managment at distribution points	1 staff per HF, 12 days, 25% of time for distribution	1 person is responsible for stock management at each distribution point or HF, prepares the material for the team each day and keeps an inventory Assumption: the work is carried out during the distribution days, 1 day before and 1 day after. This HF staff devotes 20% of his/her time		Storekeeping	1 staff per district 35 + 2 days per round 25% of time for distribution	1 person responsible for receiving IRS material, storing & monitoring stock
											Coverage survey		JM: Annual survey, part of routine surveillance conducted by NMCP; from facility data to national statistics. Not conducted as part of MDA		Pre, Mid, Post-spray inspection	3 inspections per district 1 day/ inspection 1 central staff 1 region staff 2 district staff Region and district staff are paid per-diem Transport expenses based on driver per-diem, labor and vehicle costs for region and district staff
							Rapid reporting at at community	1 CHW per HFCA (dCHW) submits data to DHIS from all CHW 0.25 days per week Mobile and airtime 10 KB of data per phone per week Plus top-up as incentive	<Assumes exisiting DHIS system in places where CI is implemented. <Only dCHW has a MoH issued phone		Reporting at community level	Paper based, dispatch forms, supplies	Dispatch forms, supplies, and CHW time costed under MDA
							EHT checks data with dCHW at facility level	1 HF staff 0.25 days per month data			Reporting at HF level	1 HF staff 0.25 days per day of campaign data	JM: Paper based by CHWs, reported via sms from HF supervisors to district, who then relay data to national level also via SMS. Higher levels costed under program costs
Other	data		Routine data quality checks at district level	1 district staff 2 days per month			Routine data quality checks at district level	1 district staff 2 days per month	based on zambia data (Larcen 2015) about a third of RDTs administered are through RACD, assume this is representative of the population seen by care provider and of volume of reporting etc. Attribute third of reporting costs to RACD. Much be lower in other settings (i.e. Senegal): Use a range between 5-30%						Review meeting	5 central NMCP staff, 3 staff/ region and 5 staff/ district 2-day meetings (3 days inlc. travel) Region and district staff receives per-diems (50% on travel days) Transport inlcudes km, vehicle, and driver for regional and district staff Meeting at NMCP offices Food and stationaries	From MACEPA: MACEPA usually conducts one post-review meeting combining it with the microplanning for the next season
			Data audit at HF level	2 district staff 1 nurse per HF 2 HF per day 13 HF audited per year			Data audit at HF level	2 district staff 1 nurse per HF 2 HF per day 13 HF audited per year	based on zambia data (Larcen 2015) about a third of RDTs administered are through RACD, assume this is representative of the population seen by care provider and of volume of reporting etc. Attribute third of reporting costs to RACD. Much be lower in other settings (i.e. Senegal): Use a range between 5-30%
			Data review at district level	1 Provincial Medical Officer (PMO) per district 2 district staff All district nurses 2 days Transportation for PMO based on driver expenses, vehicle and fuel Transportation for nurses based on flat rate Venue, supplies, refreshments			Data review at district level	1 Provincial Medical Officer (PMO) per district 2 district staff 1 nurse per HF 2 days Transportation for PMO based on driver expenses, vehicle and fuel Transportation for nurses based on flat rate Venue, supplies, refreshments	based on zambia data (Larcen 2015) about a third of RDTs administered are through RACD, assume this is representative of the population seen by care provider and of volume of reporting etc. Attribute third of reporting costs to RACD. Much be lower in other settings (i.e. Senegal): Use a range between 5-30%
	phar						Pharmachovigilance, AE	AE monitoring as part of program costs at central, regional and district levels; AE is part of routine training of nurses and CHW Included CHW in district level training for AE or data	Cites GF study 150,000-200,000 to start up and there after 50,000 USD running costs for antimalarial PV. Can attribute based on fraction of cases treated by ACD vs PCD (10-30% or lower?). Neglible if RACD is introduced in a few number of districts, very low transmission. Test in sensitivity analysis. https://www.ncbi.nlm.nih.gov/pubmed/24550105		Pharmachovigilance, AE	AE monitoring as part of program costs at central, regional and district levels; AE is part of routine training of nurses and CHW Included CHW in district level training for AE or data	AE monitoring as part of program costs at central, regional and district levels; AE is part of routine training of nurses and CHW Included CHW in district level training for AE or data
	waste						Waste management	Not costed incineration of RDTs and sharps at HF			Waste management	Not costed incineration of pregnancy tests at HF; given the likely volume costs/ incremental costs are very low			Incineration of solid waste at central level (contaminated cardboard boxes, contaminated masks, etc)	1 vehicle, 1 driver 2 staff district level 1 staff provincial level 1 staff central level 1 districts per day 2 offloaders per district Wages and per-dieams Fuel	https://www.pmi.gov/docs/default-source/default-document-library/implementing-partner-reports/zambia-end-of-spray-report-2017-indoor-residual-spray-irs-2-task-order-six-africa-irs-airs-project.pdf
	waste														Recycling insecticide bottles at central level	1 vehicle, 1 driver, 1 assistant 2 districts per day 2 offloaders per district Fuel Bottle rinsing, cleaning and preparation for shipping	https://www.pmi.gov/docs/default-source/default-document-library/implementing-partner-reports/zambia-end-of-spray-report-2017-indoor-residual-spray-irs-2-task-order-six-africa-irs-airs-project.pdf PMI’s costs tend to be generally higher than government or MACEPA costs for activities, so when you look at these costs I tend to find them out of sync with the other costs. You likely need to get these…
